# Supplementary material for: Hepatitis A virus knowledge and immunization attitudes and practices in the United Arab Emirates community
Source: PubMed Central journal article supplement (PMC7846788; doi:10.1038/s41598-020-80089-4), 2021-01-29
Supplement: 41598_2020_80089_MOESM1_ESM.pdf [file 41598_2020_80089_MOESM1_ESM.pdf]

# Hepatitis A Virus knowledge and immunization attitudes and practices in the United Arab Emirates community

*Kamel A. Samara<sup>1,\*</sup>, Hiba J. Barqawi<sup>2,\*\*</sup>, Basant H. Aboelsoud<sup>1</sup>, Moza A. Alzaabi<sup>1</sup>, Fay T. Alraddawi<sup>1</sup>, Ayten A. Manna<sup>1</sup>*

<sup>1</sup>College of Medicine, University of Sharjah, Sharjah, United Arab Emirates

<sup>2</sup>Department of Clinical Sciences, College of Medicine, University of Sharjah, United Arab Emirates

\*Corresponding author. Email: [kamel.samara@hotmail.com](mailto:kamel.samara@hotmail.com)

\*\*Corresponding author. Email: [hbarqawi@sharjah.ac.ae](mailto:hbarqawi@sharjah.ac.ae)

## Supplementary Information

S1 is the English questionnaire used for data collection.

S2 is the Arabic questionnaire used for data collection.

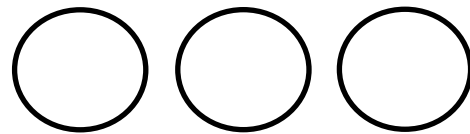

## Hepatitis A Virus knowledge and immunization attitudes and practices in the United Arab Emirates community

### Demographic Data

*Please circle the option that best describes you*

|                                        |                           |                            |                      |                                      |
|----------------------------------------|---------------------------|----------------------------|----------------------|--------------------------------------|
| <b>1) Sex</b>                          | 1) Male                   | 2) Female                  |                      |                                      |
| <b>2) Age</b>                          | 1) 18-29                  | 2) 30-39                   | 3) 40-49             | 4) 50 and above                      |
| <b>3) Highest degree obtained</b>      | 1) Middle School or lower |                            | 2) High School       |                                      |
|                                        | 3) Diploma                |                            | 4) University Degree | 5) Graduate Degree (MSc, PhD., etc.) |
| <b>4) Marital Status</b>               | 1) Single                 | 2) Married                 | 3) Other (_____)     |                                      |
| <b>5) Nationality</b>                  | 1) Emirati                | 2) Other Arab              | 3) Non-Arab          |                                      |
| <b>6) Occupation</b>                   | 1) Unemployed             | 2) Medical Field           | 3) Business/Finance  |                                      |
|                                        | 4) Government/Law         |                            | 5) Education         | 6) Arts and Communication            |
| 7) Administration, Engineering or I.T. |                           | 8) Student (Major - _____) |                      |                                      |
| <b>7) Place of Residence</b>           | 1) Sharjah                |                            | 2) Dubai             | 3) Fujairah                          |
|                                        | 4) Umm Al Quwain          | 5) Ajman                   | 6) Abu Dhabi         | 7) Ras Al Khaimah                    |

### Knowledge, Attitudes and Practices about Hepatitis Virus Infections:

**8) Have you heard of 'Hepatitis Virus'?**

- 1) Yes  2) No (Go to Question 24)

**9) How knowledgeable are you about Hepatitis Viruses?**

|                 |               |                 |           |                |
|-----------------|---------------|-----------------|-----------|----------------|
| 1<br>Not at all | 2<br>Slightly | 3<br>Moderately | 4<br>Very | 5<br>Extremely |
|-----------------|---------------|-----------------|-----------|----------------|

**10) How knowledgeable are you about Hepatitis A Virus?**

|                                     |               |                 |           |                |
|-------------------------------------|---------------|-----------------|-----------|----------------|
| 1<br>Not at all (Go to Question 24) | 2<br>Slightly | 3<br>Moderately | 4<br>Very | 5<br>Extremely |
|-------------------------------------|---------------|-----------------|-----------|----------------|



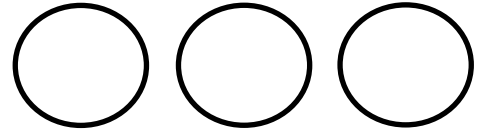

**24) A deportable disease is a one that would cause a person to be removed forcibly from the country. Which of the following do you think is deportable? (You can select more than one option)**

- |                                          |                                             |                                         |
|------------------------------------------|---------------------------------------------|-----------------------------------------|
| <input type="checkbox"/> 1) HIV          | <input type="checkbox"/> 2) Cancer          | <input type="checkbox"/> 3) Hepatitis A |
| <input type="checkbox"/> 4) Hepatitis B  | <input type="checkbox"/> 5) Hepatitis C     | <input type="checkbox"/> 6) Syphilis    |
| <input type="checkbox"/> 7) Tuberculosis | <input type="checkbox"/> 8) Mad Cow Disease | <input type="checkbox"/> 9) Malaria     |
| <input type="checkbox"/> 10) Leprosy     | <input type="checkbox"/> 11) Chlamydia      | <input type="checkbox"/> 12) HPV        |

### **Hepatitis viruses & Vaccination**

**Do you agree or disagree with the following statements?**

| Statement                                                       | 1) Agree | 2) Disagree |
|-----------------------------------------------------------------|----------|-------------|
| 25) Vaccines are important to protect children from diseases.   |          |             |
| 26) Vaccines are available for adults and elderly.              |          |             |
| 27) All Hepatitis viruses have vaccines.                        |          |             |
| 28) Vaccination causes autism.                                  |          |             |
| 29) It is not necessary that adults and elderly get vaccinated. |          |             |
| 30) Hepatitis A Virus has a vaccine.                            |          |             |
| 31) Protection from vaccination decreases with age.             |          |             |

**32) Were you vaccinated as a child from any disease?**

- 1) Yes                       2) No (*Go to 35*)                       3) I don't remember (*Go to 35*)

**33) Were you vaccinated against Hepatitis A?**

- 1) Yes                       2) No                       3) I don't remember

**34) Were you vaccinated against Hepatitis B?**

- 1) Yes                       2) No                       3) I don't remember

**35) Have you received any vaccines as an adult?**

- 1) Yes, Specify ( \_\_\_\_\_ )                       2) No

**36) Have you received the Hepatitis A vaccine as an adult?**

- 1) Yes, I've taken it                       2) No and I don't plan on taking it

3) No, but I'm planning on taking it

4) I need more information to decide

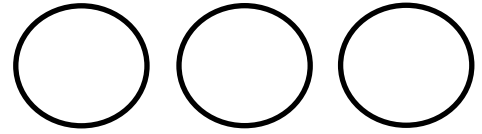

**37) Do you know which Hepatitis Viruses are part of the U.A.E.'s immunization schedule (*You can choose more than one*)?**

1) Hepatitis A

2) Hepatitis B

3) Hepatitis C

4) Hepatitis D

5) Hepatitis E

6) Hepatitis F

7) I don't know

**38) How important is the U.A.E.'s immunization schedule to you when vaccinating your children?**

|                 |               |                 |           |                |
|-----------------|---------------|-----------------|-----------|----------------|
| 1<br>Not at all | 2<br>Slightly | 3<br>Moderately | 4<br>Very | 5<br>Extremely |
|-----------------|---------------|-----------------|-----------|----------------|

**39) How likely are you to vaccinate your future children against Hepatitis A, keeping in mind that Hepatitis A Virus vaccine is not part of the U.A.E.'s immunization schedule?**

|                 |               |                 |           |                |
|-----------------|---------------|-----------------|-----------|----------------|
| 1<br>Not at all | 2<br>Slightly | 3<br>Moderately | 4<br>Very | 5<br>Extremely |
|-----------------|---------------|-----------------|-----------|----------------|

**40) If the vaccine were to be added to the immunization schedule, how likely are you to vaccinate your future children against Hepatitis A?**

|                 |               |                 |           |                |
|-----------------|---------------|-----------------|-----------|----------------|
| 1<br>Not at all | 2<br>Slightly | 3<br>Moderately | 4<br>Very | 5<br>Extremely |
|-----------------|---------------|-----------------|-----------|----------------|

**41) What do you think is the BIGGEST barrier to vaccination? (Choose all that apply)**

1) Cost

2) Availability

3) Concerns about safety

4) Unaware of benefits

5) Others, specify  
(\_\_\_\_\_)

### **Knowledge Sources and Credibility**

**42) If you wanted to learn more about a disease or medical condition, which of the following would be your MAIN source of knowledge? (*Choose one only*)**

1) General Practitioner/ Doctor

2) Internet/Social Media

3) Pharmacist

4) Brochures & other printed materials

5) Family, Friends or Colleagues

6) Others, specify  
(\_\_\_\_\_)

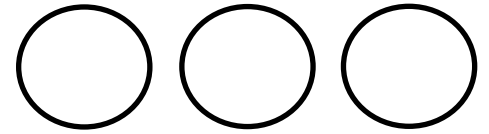

**43) If you wanted to learn more about a vaccine or its side effects, which of the following is your MAIN source of knowledge? (Choose one only)**

- |                                                                 |                                                           |                                                     |
|-----------------------------------------------------------------|-----------------------------------------------------------|-----------------------------------------------------|
| <input type="checkbox"/> 1) General Practitioner/ Doctor        | <input type="checkbox"/> 2) Internet/Social Media         | <input type="checkbox"/> 3) Pharmacist              |
| <input type="checkbox"/> 4) Brochures & other printed materials | <input type="checkbox"/> 5) Family, Friends or Colleagues | <input type="checkbox"/> 6) Others, specify (_____) |

**44) Would you be interested in learning more about Hepatitis A?**

- 1) Yes  2) No (Go to Question 46)

**45) To learn more about Hepatitis A, which of the following would be your MAIN source of knowledge? (Choose one only)**

- |                                                                 |                                                           |                                                                     |
|-----------------------------------------------------------------|-----------------------------------------------------------|---------------------------------------------------------------------|
| <input type="checkbox"/> 1) General Practitioner/Doctor         | <input type="checkbox"/> 2) Internet/Social Media         | <input type="checkbox"/> 3) Pharmacist                              |
| <input type="checkbox"/> 4) Brochures & other printed materials | <input type="checkbox"/> 5) Family, Friends or Colleagues | <input type="checkbox"/> 6) Others, specify (_____) (_____) (_____) |

**How trustworthy is each of the following sources?**

| Source                              | Level of Trust |            |              |        |             |
|-------------------------------------|----------------|------------|--------------|--------|-------------|
|                                     | 1)Not at all   | 2)Slightly | 3)Moderately | 4)Very | 5)Extremely |
| 46) General Practitioner/Doctor     |                |            |              |        |             |
| 47) Internet/ Social Media          |                |            |              |        |             |
| 48) Pharmacist                      |                |            |              |        |             |
| 49) Brochures and printed materials |                |            |              |        |             |
| 50) Family, Friends or Colleagues   |                |            |              |        |             |

***Thank you for your participation!***

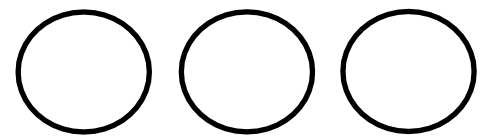

## السلوكيات والممارسات المعرفية لفيروس التهاب الكبد الوبائي (أ) والتحصين في مجتمع الإمارات العربية المتحدة

البيانات الديموغرافية - اختر الإجابة التي تناسبك

|                           |                                |                                     |
|---------------------------|--------------------------------|-------------------------------------|
| (1) الجنس                 | (1) ذكر                        | (2) أنثى                            |
| (2) العمر                 | (1) 29-18                      | (2) 39-30                           |
| (3) أعلى شهادة حاصل عليها | (1) مدرسة إعدادية أو أقل       | (2) مدرسة ثانوية                    |
| (4) الحالة الاجتماعية     | (1) أعزب                       | (2) متزوج                           |
| (5) الجنسية               | (1) إماراتي                    | (2) جنسية عربية أخرى                |
| (6) الجهة الوظيفية        | (1) غير موظف                   | (2) المجال الطبي                    |
| (5) القطاع التعليمي       | (6) المجال الفني / علاقات عامة | (7) الإدارة/ الهندسة / علوم الحاسوب |
| (7) مكان الإقامة          | (1) الشارقة                    | (2) دبي                             |
| (4) أم القيوين            | (5) عجمان                      | (6) أبوظبي                          |
| (3) أعلى شهادة حاصل عليها | (4) شهادة جامعية               | (5) دراسات عليا                     |
| (4) الحالة الاجتماعية     | (3) غير ذلك ( )                |                                     |
| (6) الجهة الوظيفية        | (3) الجهة المالية / محاسبة     | (4) مجال القانون                    |
| (5) القطاع التعليمي       | (8) طالب (التخصص - )           |                                     |
| (7) مكان الإقامة          | (3) الفجيرة                    |                                     |
| (4) أم القيوين            | (7) رأس الخيمة                 |                                     |

### السلوكيات المعرفية تجاه التهاب الكبد الوبائي - A

(8) هل سمعت عن فيروس التهاب الكبد ؟

1-  نعم 2-  لا ( انتقل لسؤال 24 )

(9) عبر عن مدى معرفتك لفيروسات التهاب الكبد ؟

|          |           |            |           |               |
|----------|-----------|------------|-----------|---------------|
| (1) أبدا | (2) قليلة | (3) متوسطة | (4) كبيرة | (5) كبيرة جدا |
|----------|-----------|------------|-----------|---------------|

(10) عبر عن مدى معرفتك لفيروسات التهاب الكبد A ؟

|                           |           |            |           |               |
|---------------------------|-----------|------------|-----------|---------------|
| (1) أبدا (انتقل لسؤال 24) | (2) قليلة | (3) متوسطة | (4) كبيرة | (5) كبيرة جدا |
|---------------------------|-----------|------------|-----------|---------------|

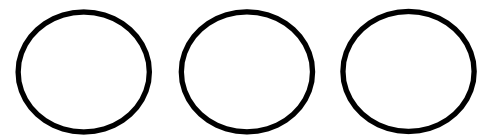

11) أي أنواع فيروسات التهاب الكبد يمكن أن تصيب الانسان؟ ( يمكن اختيار أكثر من إجابة )

- 1) التهاب الكبد A  2) التهاب الكبد B  3) التهاب الكبد C   
4) التهاب الكبد D  5) التهاب الكبد E  6) التهاب الكبد F   
7) لا شيء مما ذكر

12) ما مدى انتشار فيروس التهاب الكبد A ؟

|         |          |           |          |              |
|---------|----------|-----------|----------|--------------|
| 1) أبدا | 2) قليلة | 3) متوسطة | 4) كبيرة | 5) كبيرة جدا |
|---------|----------|-----------|----------|--------------|

13) هل يعتبر فيروس التهاب الكبد A فتاكاً ؟

|         |          |           |          |              |
|---------|----------|-----------|----------|--------------|
| 1) أبدا | 2) قليلة | 3) متوسطة | 4) كبيرة | 5) كبيرة جدا |
|---------|----------|-----------|----------|--------------|

هل توافق على العبارات التالية المتعلقة بفيروس التهاب الكبد A أم لا؟

| العبرة                                                                                   | 1) أوافق | 2) لا أوافق | 3) لا أعلم |
|------------------------------------------------------------------------------------------|----------|-------------|------------|
| 14) الأمراض المتعلقة به مزمنة                                                            |          |             |            |
| 15) معظم أمراض التهاب الكبد A ليس لها أعراض على الأطفال                                  |          |             |            |
| 16) كلما كبر الشخص في العمر ، قلت حدية المرض وأصبح فتاكاً بشكل أقل                       |          |             |            |
| 17) العدوى تسبب المرض خلال 48 ساعة                                                       |          |             |            |
| 18) يتوفر هناك أدوية لعلاج هذه العدوى                                                    |          |             |            |
| 19) بعض الحالات (حال تطورها) يمكن أن تؤدي إلى فشل الكبد                                  |          |             |            |
| 20) يتم فحص الشخص الخاضع لاختبار اللياقة البدنية في دولة الإمارات / لأغراض تجديد الإقامة |          |             |            |
| 21) التعرض للفيروس يقي من الإصابة به في المستقبل                                         |          |             |            |

22) كيف يمكن لفيروس التهاب الكبد A أن ينتقل؟ ( يمكن اختيار أكثر من إجابة )

- 1) أطعمة / مياه ملوثة  2) اتصال مباشر مع شخص مصاب بفيروس التهاب الكبد A  3) المشاركة بالإبر / نقل الدم   
4) اتصال جنسي بشخص مصاب بفيروس الكبد A  5) الهواء & العطاس  6) المشاركة بالمناشف / الملابس

23) ما الذي يمكن أن يسببه التهاب الكبد A؟ ( يمكن اختيار أكثر من إجابة )

- 1) اصفرار الجلد/ العينين  2) القيء  3) آلام المعدة





6  آلام المفاصل

5  الحرارة

4  الشعور بالتعب

24) الأمراض الترحيلية، هي الأمراض التي تؤدي إلى ترحيل الشخص إجباريا إذا تم تأكيد حملة لها. ما الأمراض من الأمراض الآتية قد تظن أنها قد تؤدي للترحيل؟ ( يمكن اختيار أكثر من إجابة )

- 1  فيروس نقص المناعة  
2  السرطان  
3  التهاب الكبد A  
4  التهاب الكبد B  
5  التهاب الكبد C  
6  مرض الزهري ( السفلس )  
7  مرض السل  
8  مرض جنون البقر  
9  الملاريا  
10  الجذام  
11  الكلاميديا  
12  فيروس الورم الحليمي البشري

### فيروسات التهاب الكبد و التطعيم

هل توافق أو لا توافق العبارات الآتية؟

| العبارة                                                | (1) أوافق | (2) لا أوافق |
|--------------------------------------------------------|-----------|--------------|
| 25) التطعيم مهم جدا لحماية الأطفال من الأمراض.         |           |              |
| 26) التطعيم متوفر أيضا للبالغين و كبار السن.           |           |              |
| 27) جميع فيروسات التهاب الكبد لديها تلقيحات .          |           |              |
| 28) التطعيمات تسبب التوحد.                             |           |              |
| 29) ليس من الضروري للبالغين و كبار السن أخذ التطعيمات. |           |              |
| 30) فيروس التهاب الكبد A له تطعيم.                     |           |              |
| 31) الحماية المكتسبة من التطعيم تتناقص مع تقدم العمر.  |           |              |

32) هل تم تطعيمك ضد أي مرض عندما كنت صغيرا؟

3- لا أتذكر  (انتقل لسؤال 35)

1- نعم  2- لا (انتقل لسؤال 35)

33) هل تم تطعيمك ضد فيروس التهاب الكبد A؟

3- لا أتذكر

1- نعم  2- لا

34) هل تم تطعيمك ضد فيروس التهاب الكبد B؟

3- لا أتذكر

1- نعم  2- لا

35) هل تم تطعيمك كشخص بالغ؟

1- نعم، (نوع التطعيم، \_\_\_\_\_)  2- لا

36) هل تم تطعيمك ضد فيروس التهاب الكبد A كشخص بالغ؟

4- أحتاج المزيد من المعلومات لأقرر

3- لا، و لكني أخطئ لذلك

1- نعم  2- لا، ولا أخطئ لذلك

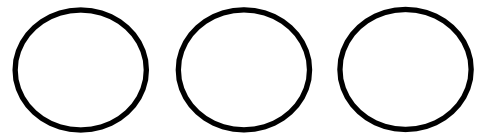

37 هل لديك معلومات أو فكرة أياً من الفيروسات المرتبطة بالتهاب الكبد الوبائي تعد جزء من جدول التطعيمات في دولة الإمارات العربية المتحدة ؟ ( يمكن اختيار أكثر من إجابة )

- 1  التهاب الكبد A  
2  التهاب الكبد B  
3  التهاب الكبد C  
4  التهاب الكبد D  
5  التهاب الكبد E  
6  التهاب الكبد F  
7 لا اعلم

38 ما مدى أهمية جدول التطعيمات في دولة الإمارات العربية المتحدة لك عند تطعيم أطفالك؟

|          |          |           |          |               |
|----------|----------|-----------|----------|---------------|
| 1) أبداً | 2) قليلة | 3) متوسطة | 4) كبيرة | 5) كبيرة جداً |
|----------|----------|-----------|----------|---------------|

39 ما هي احتمالية تطعيمك لأطفالك بالمستقبل ضد فيروس التهاب الكبد A، مع العلم أن التطعيم ضده ليس إجبارياً من قبل دولة الإمارات العربية المتحدة ؟

|          |          |           |          |               |
|----------|----------|-----------|----------|---------------|
| 1) أبداً | 2) قليلة | 3) متوسطة | 4) كبيرة | 5) كبيرة جداً |
|----------|----------|-----------|----------|---------------|

40 ما هي احتمالية تطعيم طفلك إذ ما تم تصنيف فيروس التهاب الكبد A من التطعيمات الإجبارية من قبل الدولة ؟

|          |          |           |          |               |
|----------|----------|-----------|----------|---------------|
| 1) أبداً | 2) قليلة | 3) متوسطة | 4) كبيرة | 5) كبيرة جداً |
|----------|----------|-----------|----------|---------------|

41 برأيك ، ما هي أكبر العوائق التي يمكن أن تواجه التطعيم ؟ ( يمكن اختيار أكثر من إجابة )

- 1  السعر  
2  عدم التوفر  
3  مخاوف بشأن السلامة  
4  عدم معرفة الفائدة  
5  أخرى، يرجى التحديد (\_\_\_\_\_)

### مصادر المعرفة والمصادقية

42 إذ ما أردت التعلم أكثر عن التطعيم و الأثار الجانبية له أياً مما يلي قد يكون مرجعك الأول للحصول على المعلومات ؟ (اختر اجابه واحده )

- 1- طبيب عام  2- الإنترنت و مواقع التواصل الإجتماعي  3- الصيدلاني   
4- الكتيبات و المنشورات  5- الأهل، الأصدقاء، و الزملاء  6- أخرى، يرجى التحديد (\_\_\_\_\_)

43 إذ أردت التعلم عن مرض معين أو عن حالات طبية، أياً مما يلي قد يكون مرجعك الأول للحصول على المعلومات ؟ (اختر اجابه واحده )

- 1- طبيب عام  2- الإنترنت و مواقع التواصل الإجتماعي  3- الصيدلاني   
4- الكتيبات و المنشورات  5- الأهل، الأصدقاء، و الزملاء  6- أخرى، يرجى التحديد (\_\_\_\_\_)



44 هل تريد معرفة المزيد عن التهاب الكبد A ؟

2- لا ( انتقل لسؤال 46 )

1- نعم

45 إذ أردت التعلم أكثر عن مرض فيروس التهاب الكبد A، أي مما يلي قد يكون مرجعك الأول للحصول على المعلومات ؟ (اختر اجابه واحده )

3 - الصيدلاني

2-الإنترنت و مواقع التواصل الإجتماعي

1- طبيب عام

6-أخرى، يرجى التحديد ( )

5-الأهل، الأصدقاء، و الزملاء

4- الكتيبات و المنشورات

ما مدى مصداقية كلا من المصادر التالية ؟

| درجة المصداقية |          |          |          |                   | المصدر                                 |
|----------------|----------|----------|----------|-------------------|----------------------------------------|
| 5) موثوق جدا   | 4) موثوق | 3) متوسط | 2) قليلا | 1) غير موثوق أبدا |                                        |
|                |          |          |          |                   | 46) طبيب عام                           |
|                |          |          |          |                   | 47) الإنترنت و مواقع التواصل الإجتماعي |
|                |          |          |          |                   | 48) الصيدلاني                          |
|                |          |          |          |                   | 49) الكتيبات و المنشورات               |
|                |          |          |          |                   | 50) الأهل، الأصدقاء، و الزملاء         |

شكرا للمشاركة !
